# Supplementary material
Source: MDPI journal article supplement (https://www.mdpi.com/2624-5647/1/1/4)
Supplement: s1 [file s1]

## Supplementary

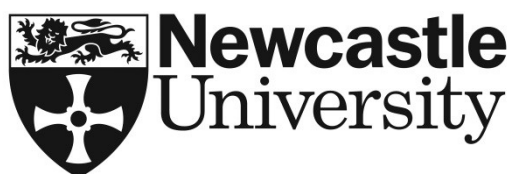

### Study title: The Potential for Food and Beverages to Trigger Reflux

Post Consumption (X minutes)

Participant ID : \_\_\_\_\_

Sample consumed : \_\_\_\_\_

#### Perception of Gastric Sensation

**Instructions:** Please answer each of the following questions by indicating which number most accurately represent your current feeling towards the described sensation. Please answer all questions.

*0 represents "Not at all", suggesting that it is contrary from how you feel currently. 5 represents "Very much", suggesting that it is very similar to how you feel currently.*

|                                            | 0 ( <i>Not at all</i> ) | 1 | 2 | 3 | 4 | 5 ( <i>Very much</i> ) |
|--------------------------------------------|-------------------------|---|---|---|---|------------------------|
| Fullness in my stomach                     |                         |   |   |   |   |                        |
| Feeling of heartburn                       |                         |   |   |   |   |                        |
| Urge to belch                              |                         |   |   |   |   |                        |
| Urge to cough                              |                         |   |   |   |   |                        |
| Churning of stomach/Making noises          |                         |   |   |   |   |                        |
| Breathing difficulties or choking episodes |                         |   |   |   |   |                        |

#### Symptoms Observed

Frequency of belches observed from X interval after consumption: \_\_\_\_\_

Any other symptoms observed? (e.g. Regurgitation, chest pain, nausea, dysphagia)

---

---

---

---
